# Supplementary material for: Oxidation of glycogen “molecular nanoparticles” by periodate
Source: Royal Society of Chemistry journal article supplement (doi:10.1039/c2py20625k), 2012-09-28
Supplement: c2py20625k.pdf [file c2py20625k.pdf]

## Supporting Information

### Oxidation of Glycogen “Molecular Nanoparticles” by Periodate

Monica Bertoldo, Giovanni Zampano, Lena Suffner, Elisa Liberati and Francesco Ciardelli

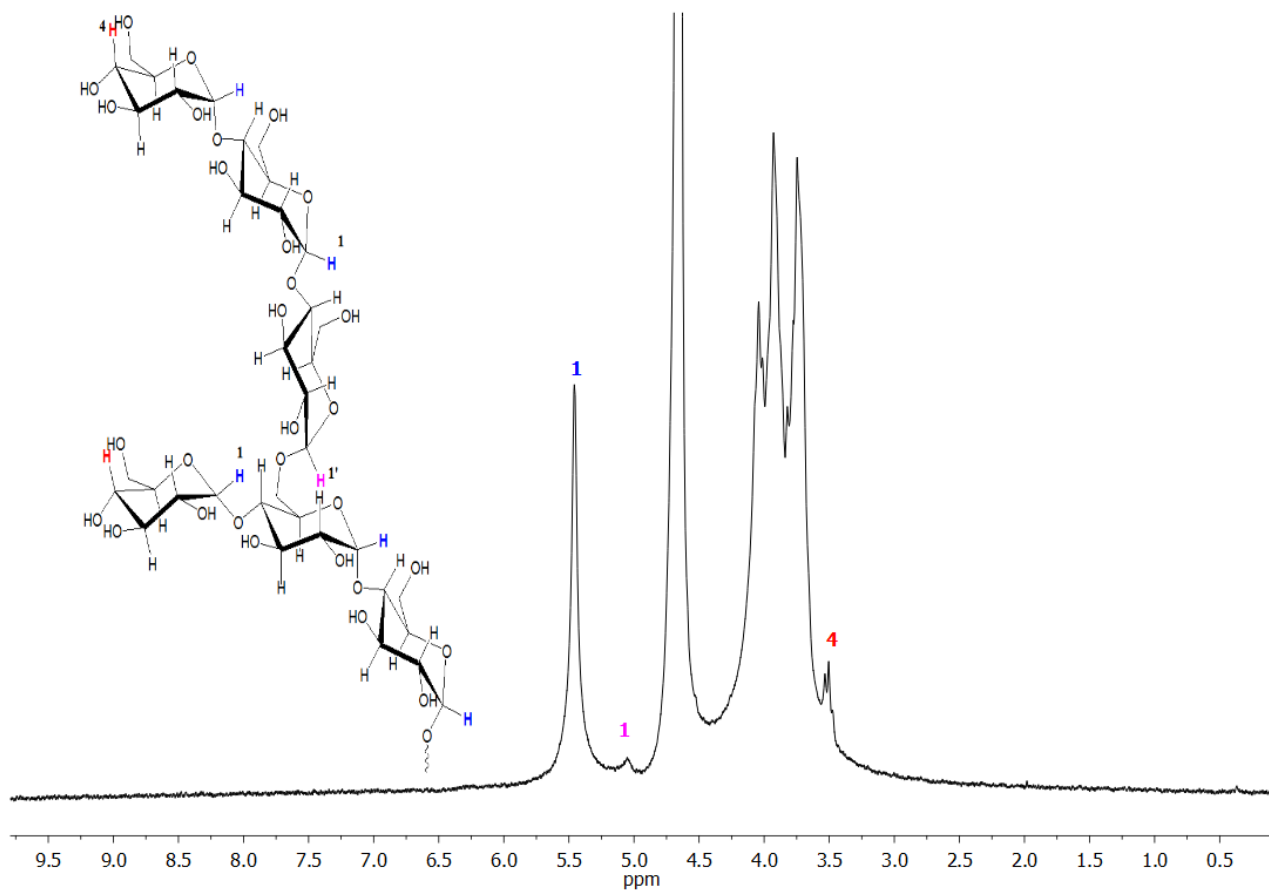

Figure S1:  $^1\text{H}$  NMR spectrum of glycogen; 300 MHz;  $\text{D}_2\text{O}$ ; room temperature

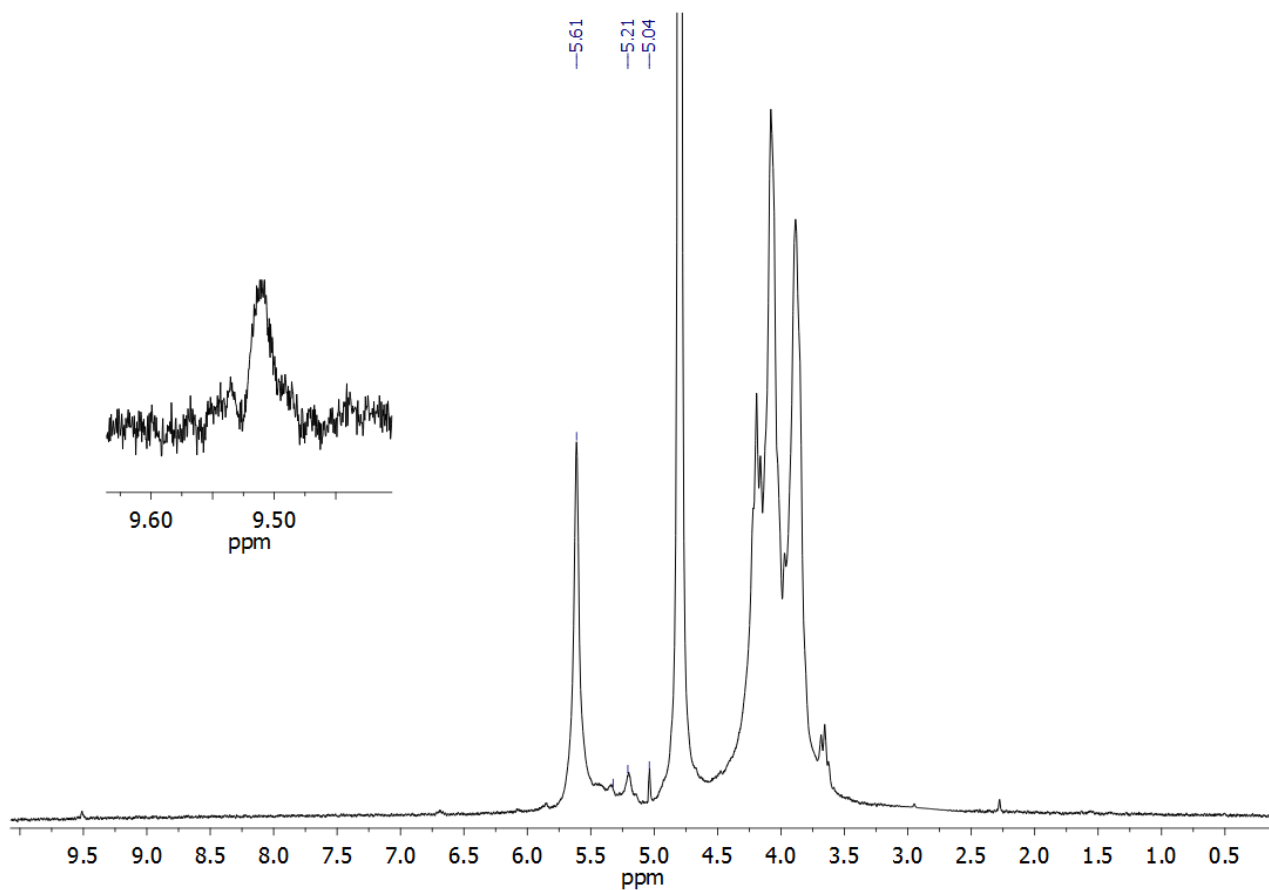

Figure S2:  $^1\text{H}$  NMR spectrum of G6; 300 MHz;  $\text{D}_2\text{O}$ ; room temperature

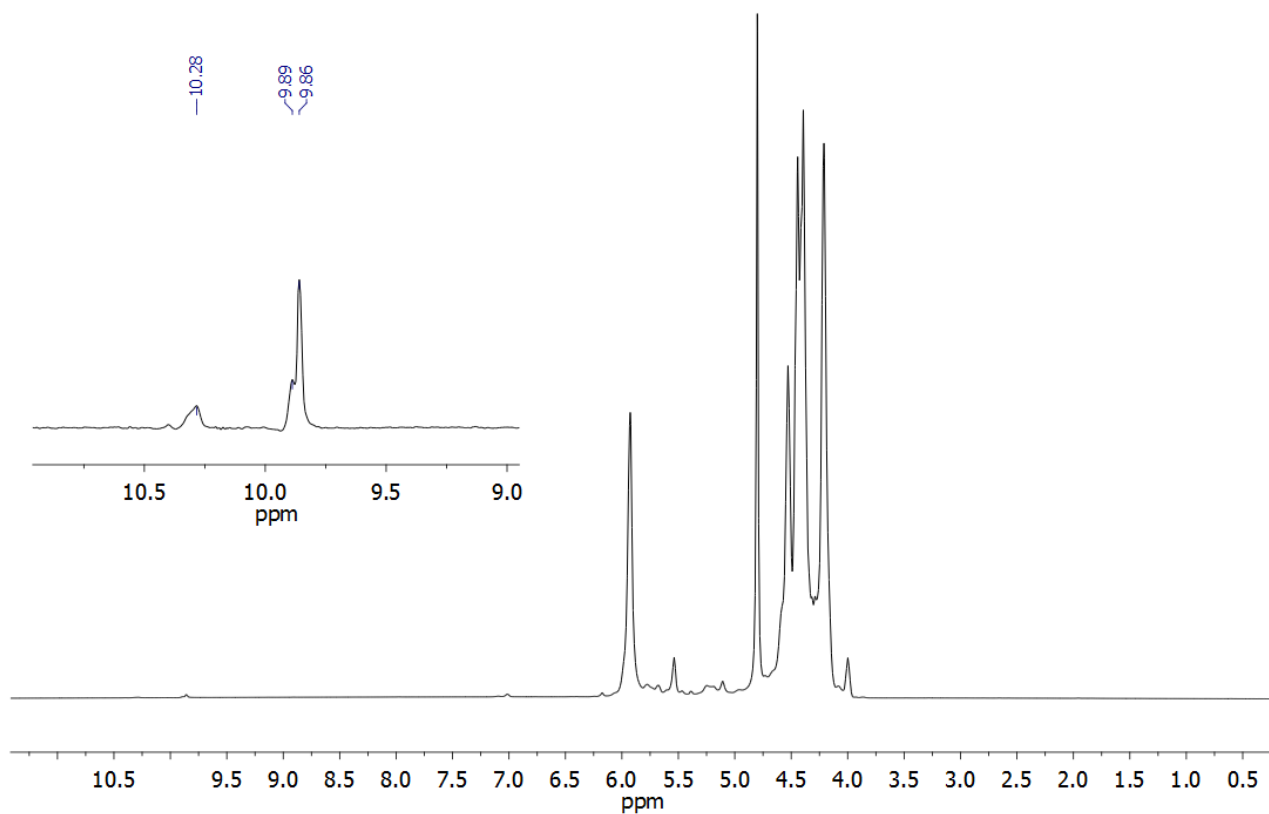

Figure S3:  $^1\text{H}$  NMR spectrum of G6; 600 MHz;  $\text{D}_2\text{O}$ ;  $80^\circ\text{C}$

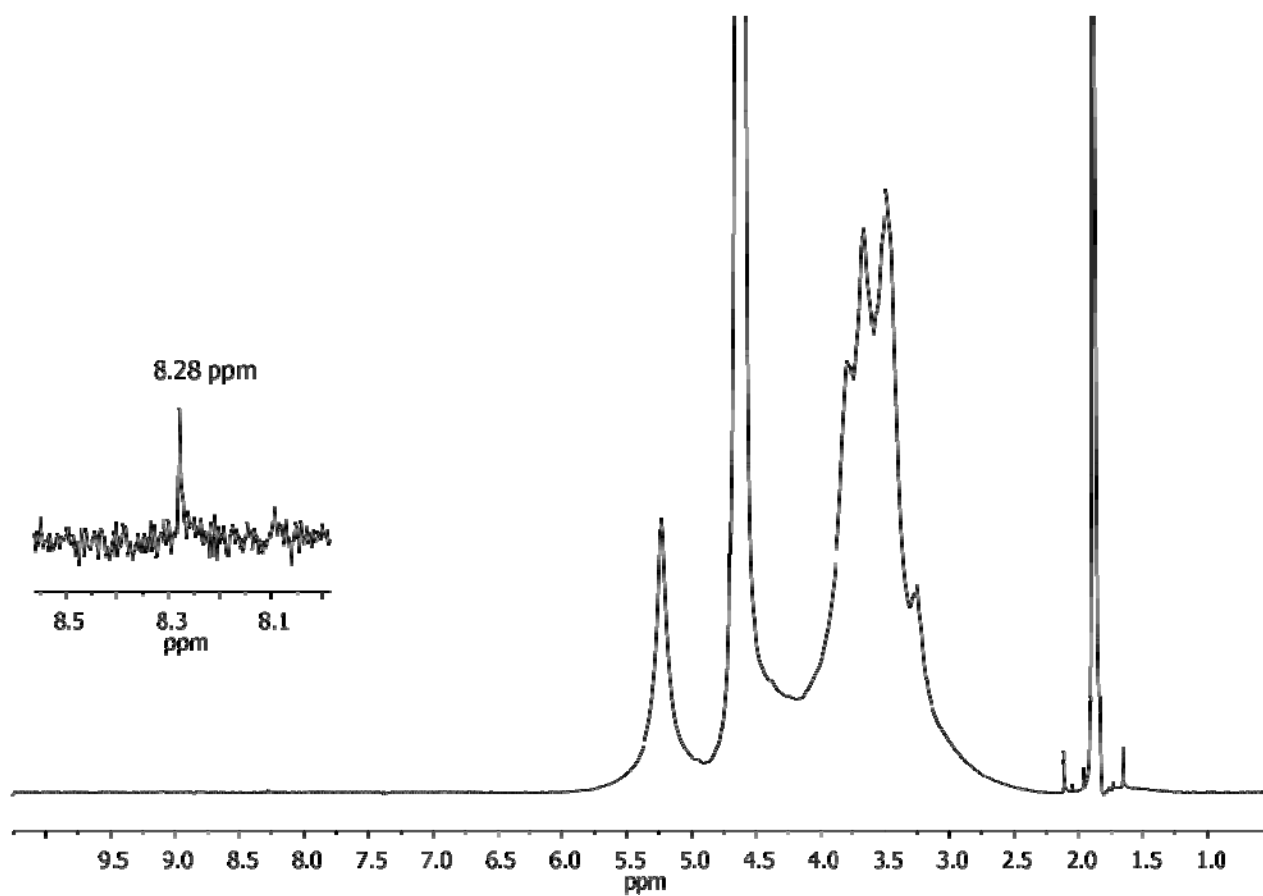

Figure S4:  $^1\text{H}$  NMR spectrum of glycogen oxidized directly into the NMR tube;  $\text{IO}_4^-$ /glycoside units 0 5.6 % mol; 300 MHz;  $\text{D}_2\text{O}$ ; room temperature.

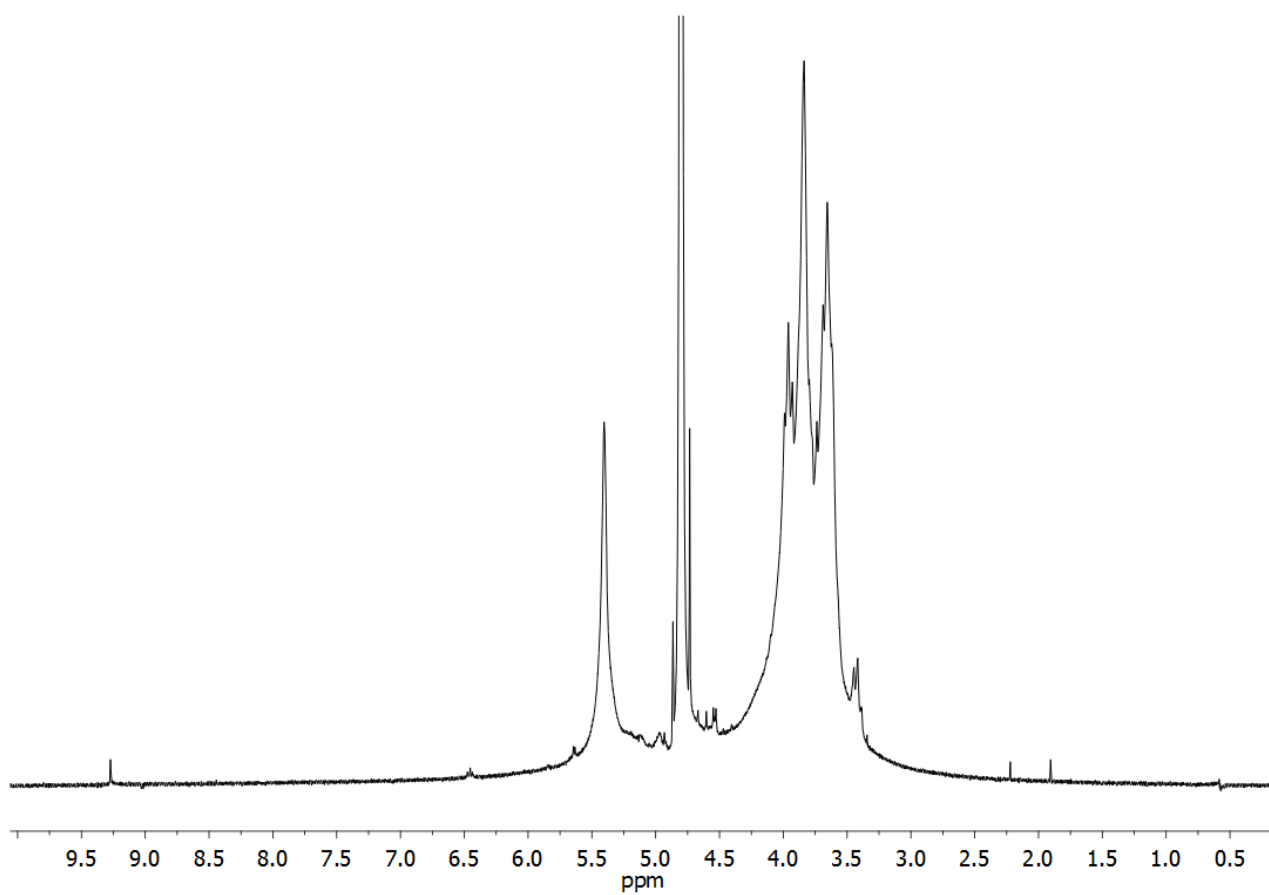

Figure S5:  $^1\text{H}$  NMR spectrum of G6; 300 MHz;  $\text{D}_2\text{O}$ ; room temperature
